# Supplementary material for: Remodeling Articular Immune Homeostasis with an Efferocytosis-inspired Nanoimitator Mitigates Rheumatoid Arthritis
Source: Research Square preprint supplement (doi:10.21203/rs.3.rs-1159315/v1), 2022-01-05
Supplement: Supplementary file 1 [file 5d32f9a9e6d73c1f0054fd12.pdf]

1  
2  
3  
4  
5  
6  
7  
8  
9  
10  
11  
12  
13  
14  
15  
16  
17  
18  
19  
20  
21  
22  
23  
24  
25  
26  
27  
28  
29

**Supplementary Information for**  
**Remodeling Articular Immune Homeostasis with an Efferocytosis-inspired**  
**Nanoimitator Mitigates Rheumatoid Arthritis**

Shengchang Zhang<sup>1</sup>, Qihao Chai<sup>2,3</sup>, Chunwei Tang<sup>1</sup>, Ziyang Li<sup>2,3</sup>, Zhentao Man<sup>2,3</sup>, Chen  
Chen<sup>1</sup>, Jing Zhang<sup>1</sup>, Ying Liu<sup>1</sup>, Peng Sun<sup>4</sup>, Rui Zhang<sup>1</sup>, Zhenmei Yang<sup>1</sup>, Maosen Han<sup>1</sup>,  
Yan Wang<sup>1</sup>, Xia Wei<sup>5</sup>, Jun Li<sup>5</sup>, Wei Li<sup>2,3</sup>, Mohnad Abdalla<sup>1</sup>, Gongchang Yu<sup>6</sup>, Bin Shi<sup>6</sup>,  
Xinyi Jiang<sup>1,7\*</sup>

\*Corresponding author: Xinyi Jiang, Ph.D.

Phone/Fax: +86-15662758621

Email: [xinyijiang@sdu.edu.cn](mailto:xinyijiang@sdu.edu.cn)

30 **Contents**

31 Supplementary Scheme 1. Synthetic of NBC.

32 Supplementary Figure 1. <sup>1</sup>H NMR spectrum of NBC in DMSO-d<sub>6</sub>.

33 Supplementary Scheme 2. Synthetic route developed to produce PtdSer-NBC.

34 Supplementary Figure 2. <sup>1</sup>H NMR spectrum of PtdSer-NBC in CDCl<sub>3</sub>.

35 Supplementary Figure 3. Zeta potential of DOPA-stabilized nanocore, PtdSer-  
36 coronated nanocore and siIRF5@EINI.

37 Supplementary Figure 4. Flow cytometry analysis of PtdSer-presenting.

38 Supplementary Figure 5. The expression levels of CD11b and F4/80 in BMDMs  
39 analyzed by flow cytometry.

40 Supplementary Figure 6. Fluorescent visualization of siRNA localization in  
41 macrophages 6 hours after incubation with nanoimitator.

42 Supplementary Figure 7. Flow cytometric analysis of the purity of neutrophils.

43 Supplementary Figure 8. Effective intervention by nanoimitator on inflammatory  
44 neutrophils.

45 Supplementary Figure 9. IRF5 expression in macrophages treated with different  
46 formulations, detected by western blot.

47 Supplementary Figure 10. Metformin reprogramming mitochondrial metabolism in  
48 macrophages, which act as mitochondrial complex I (CI) inhibitor directly inhibit CI-  
49 derived ROS.

50 Supplementary Figure 11. Systemic toxicity evaluation of siIRF5@EINI.

51 Supplementary Figure 12. Representative lesions image from macroscopic observation  
52 of the hind paws in different treatment groups.

53 Supplementary Figure 13. Representative signal images of the footprint assay.

54 Supplementary Figure 14. Western blot images of IRF5 protein levels in the synovial  
55 macrophages in different formulations treated group.

56 Supplementary Figure 15. H&E staining of synovium and immunohistochemical  
57 analyses of the TRAP-stained osteoclasts.

58 Supplementary Table 1. List of primers used for real-time PCR.

59 **Supplementary Scheme 1. Synthetic of NBC.**

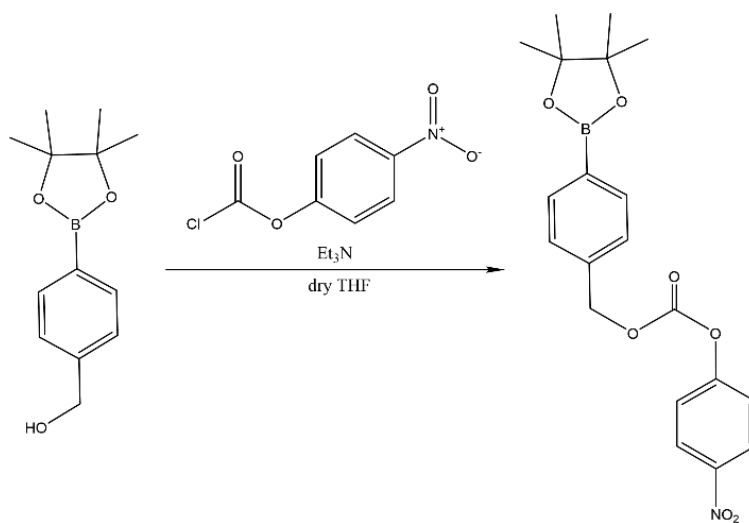

60

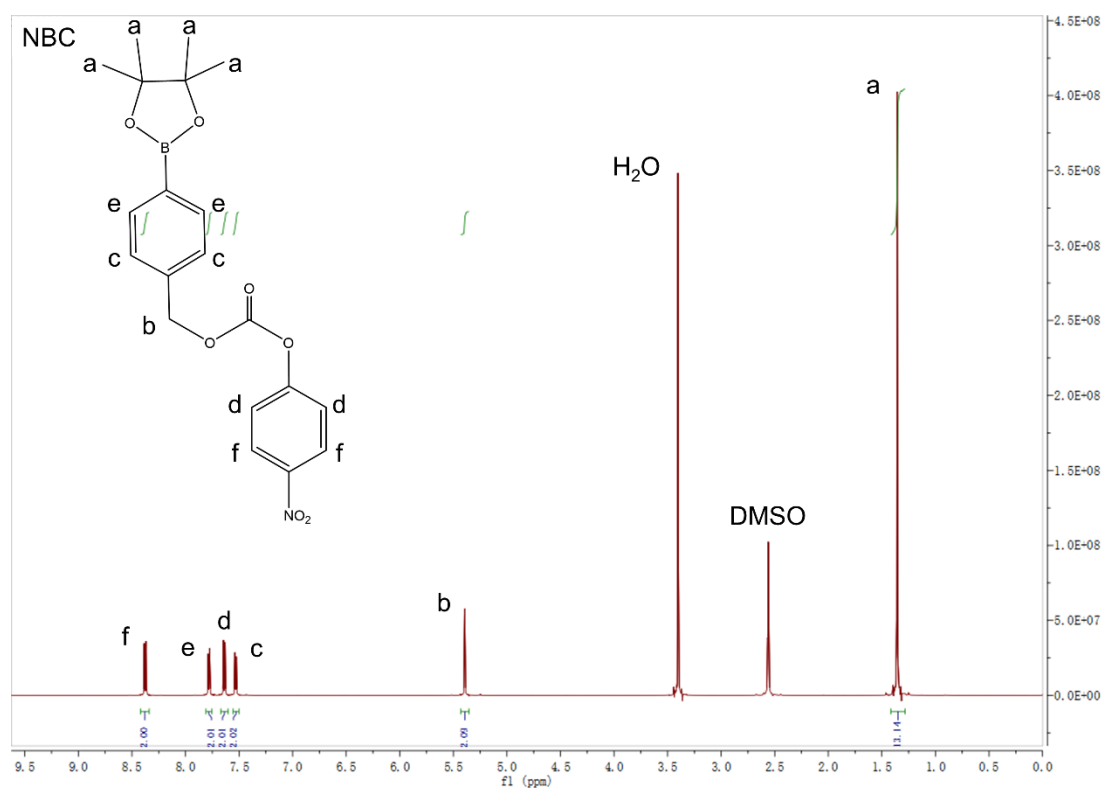

61

62 **Supplementary Figure 1. <sup>1</sup>H NMR spectrum of NBC in DMSO-d<sub>6</sub>.**

63

64

65

66

67

68

69

70 **Supplementary Scheme 2. Synthetic route developed to produce PtdSer-NBC.**

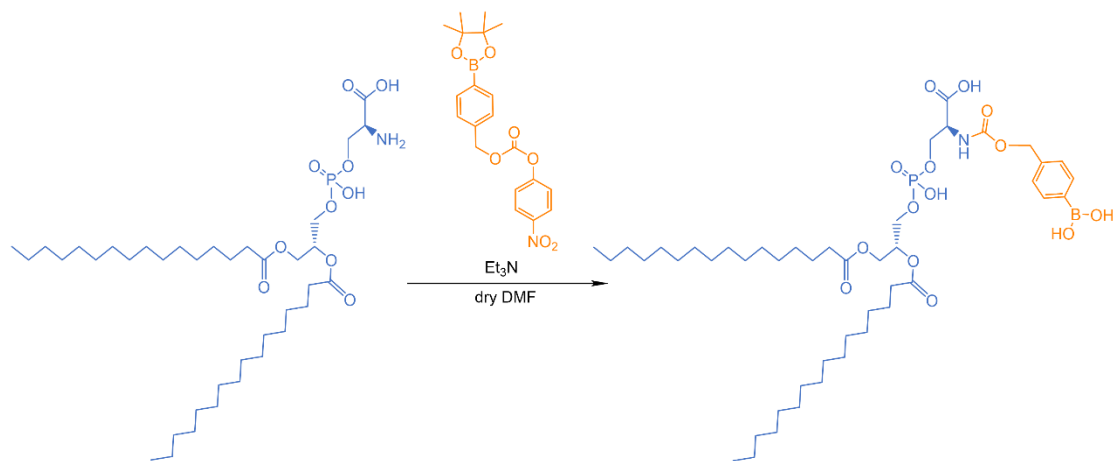

71

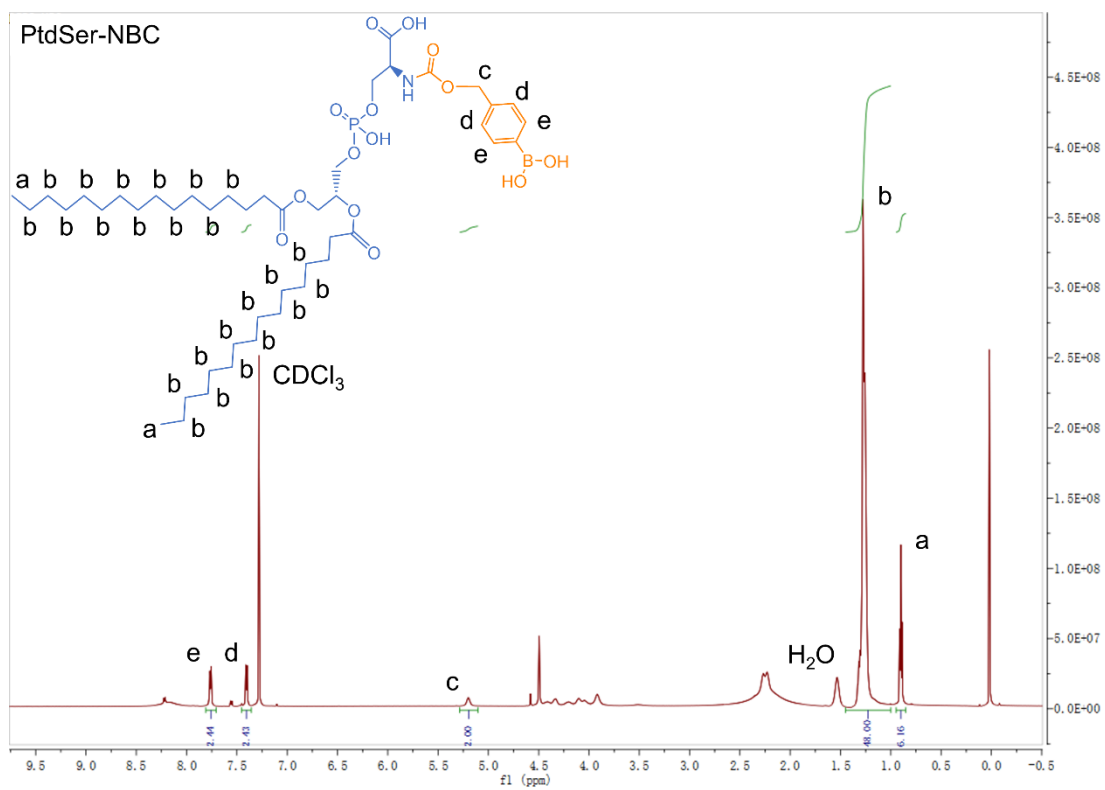

72

73 **Supplementary Figure 2. <sup>1</sup>H NMR spectrum of PtdSer-NBC in CDCl<sub>3</sub>.**

74

75

76

77

78

79

80

81

82

83

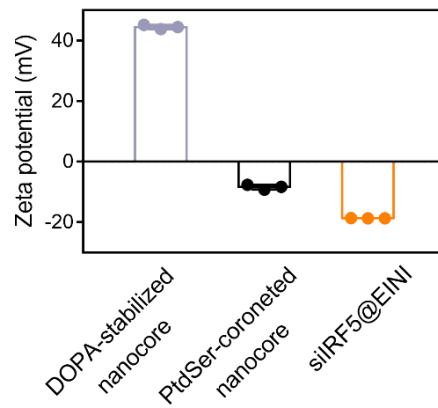

84

85 **Supplementary Figure 3. Zeta potential of DOPA-stabilized nanocore, PtdSer-**  
86 **coroneted nanocore and siIRF5@EINI.**

87

88

89

90

91

92

93

94

95

96

97

98

99

100

101

102

103

104

105

106

107

108

109

110

111

112

113

114

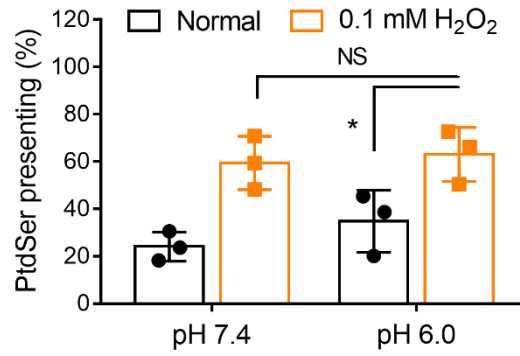

115

116 **Supplementary Figure 4. Flow cytometry analysis of PtdSer-presenting.** The  
 117 nanoimitator was resuspended in PBS at pH 7.4 or pH 6.0 respectively, and was  
 118 incubated with or without H<sub>2</sub>O<sub>2</sub> (0.1 mM). Data are presented as the mean  $\pm$  s.d. ( $n = 3$   
 119 independent experiments).  $**P < 0.01$ . NS, not significant.

120

121

122

123

124

125

126

127

128

129

130

131

132

133

134

135

136

137

138

139

140

141

142

143

144

145

146

147

148

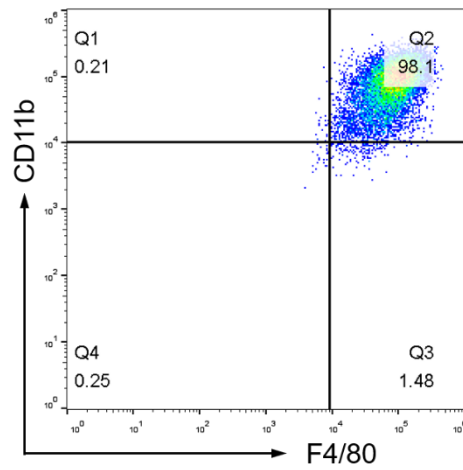

149 **Supplementary Figure 5. The expression levels of CD11b and F4/80 in BMDMs**  
150 **analyzed by flow cytometry.**

151  
152  
153  
154  
155  
156  
157  
158  
159  
160  
161  
162  
163  
164  
165  
166  
167  
168  
169  
170  
171  
172  
173  
174  
175  
176  
177  
178

179

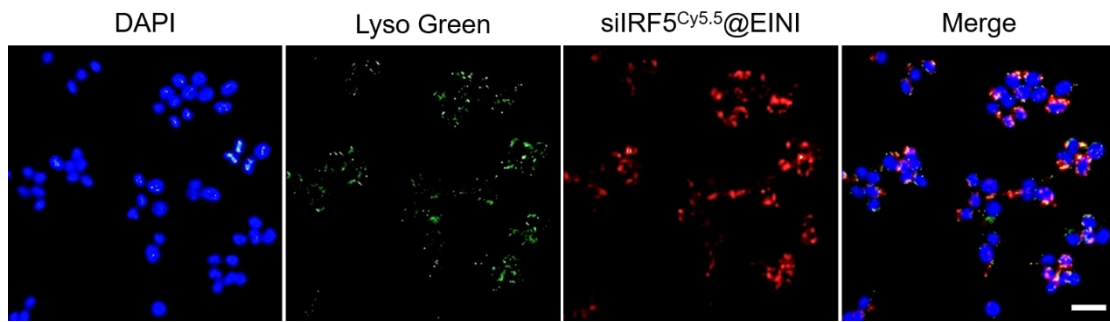

180 **Supplementary Figure 6. Fluorescent visualization of siRNA localization in**  
181 **macrophages 6 hours after incubation with nanoimitator. Scale bars, 50 nm.**

182

183

184

185

186

187

188

189

190

191

192

193

194

195

196

197

198

199

200

201

202

203

204

205

206

207

208

209

210

211

212

213

214

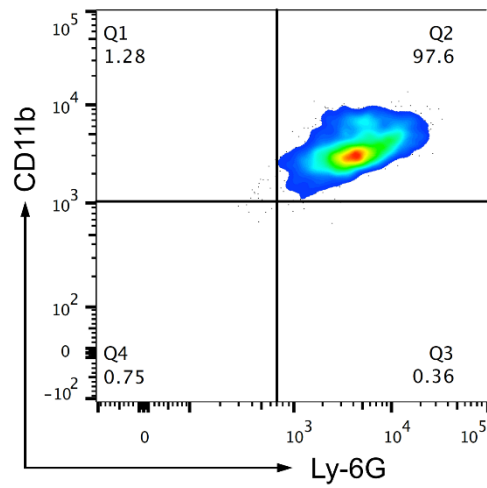

215

216 **Supplementary Figure 7. Flow cytometric analysis of the purity of neutrophils**  
217 **doubly stained with FITC-conjugated Ly-6G and PerCP-Cy5.5-conjugated**  
218 **CD11b antibodies.**

219

220

221

222

223

224

225

226

227

228

229

230

231

232

233

234

235

236

237

238

239

240

241

242

243

244

245

246

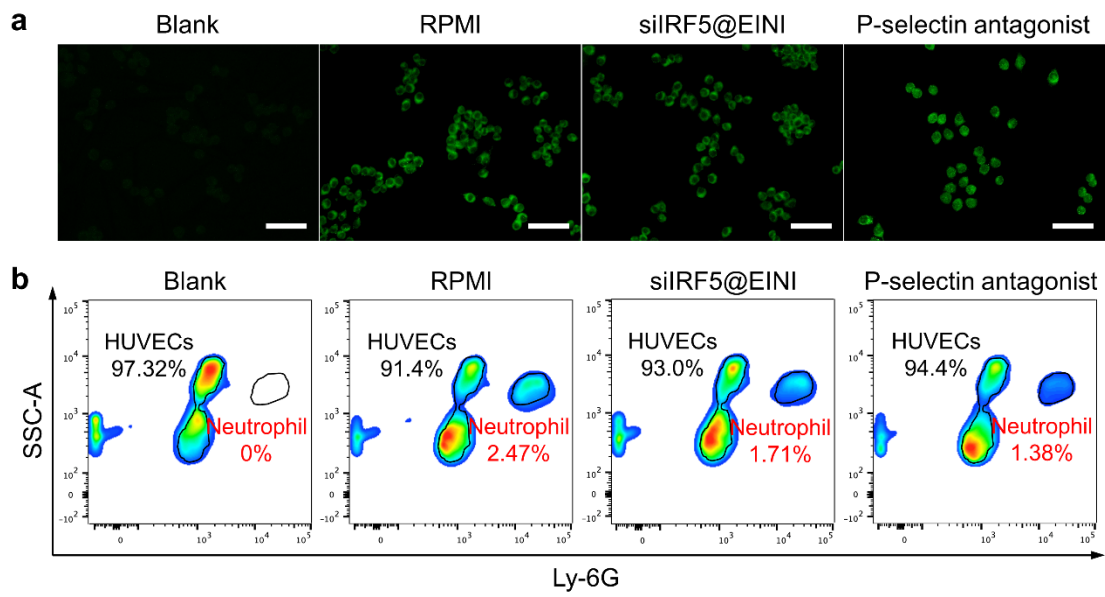

247

248 **Supplementary Figure 8. Effective intervention by nanoimitator on inflammatory**  
249 **neutrophils. a**, Evaluation of neutrophil adhesion to a HUVECs monolayer after  
250 incubation with nanoimitator. Scale bars, 50 nm. **b**, FACS analysis of neutrophil  
251 adhesion to HUVECs. All values are expressed as the mean  $\pm$  s.d. ( $n = 3$  independent  
252 experiments).

253

254

255

256

257

258

259

260

261

262

263

264

265

266

267

268

269

270

271

272

273

274

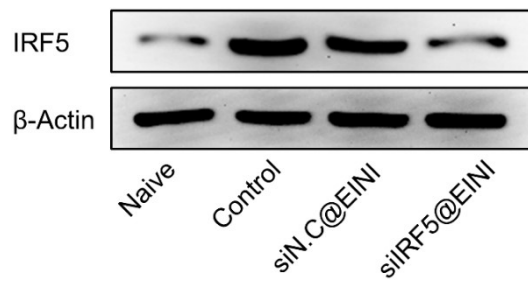

275 **Supplementary Figure 9. IRF5 expression in macrophages treated with different**  
276 **formulations, detected by western blot.**

277

278

279

280

281

282

283

284

285

286

287

288

289

290

291

292

293

294

295

296

297

298

299

300

301

302

303

304

305

306

307

308

309

310

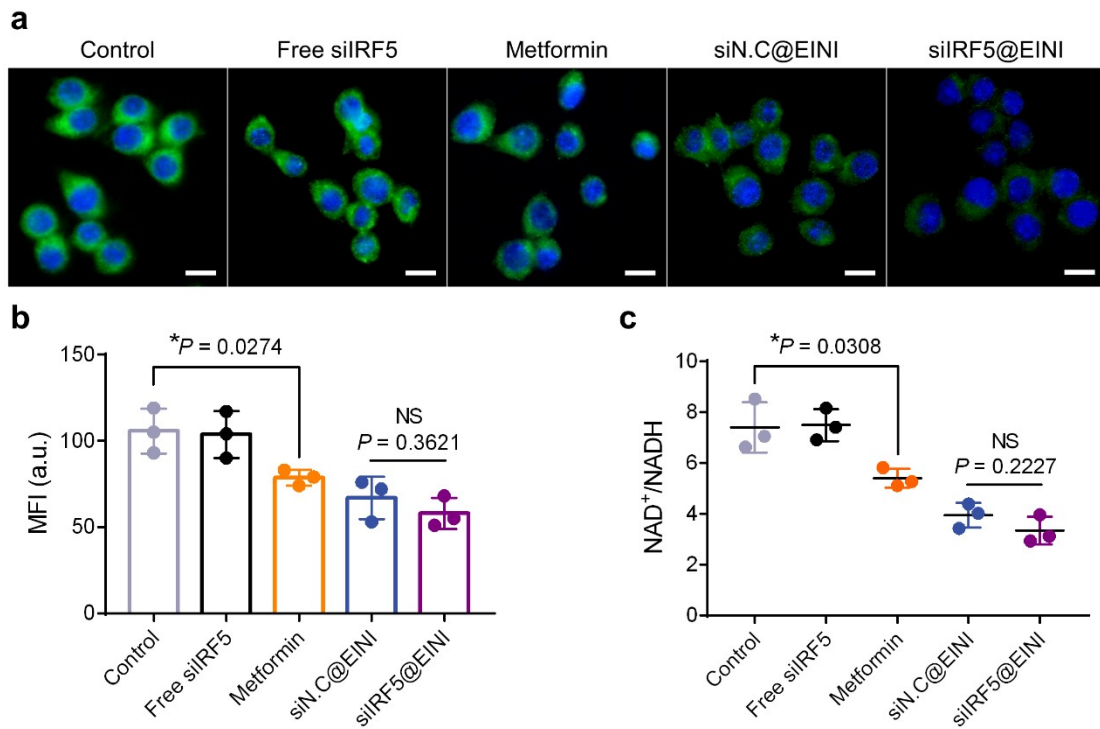

312 **Supplementary Figure 10. Metformin reprogramming mitochondrial metabolism**  
 313 **in macrophages, which act as mitochondrial complex I (CI) inhibitor directly**  
 314 **inhibit CI-derived ROS. a**, Fluorescence images and the quantification result (**b**) of  
 315 intracellular ROS generation in macrophages stained with DCFH-DA. The scale bars  
 316 were 20  $\mu$ m. **c**, The levels of oxidized and reduced nicotinamide adenine dinucleotide  
 317 (NAD<sup>+</sup>/NADH) were measured in macrophages using a colorimetric assay. All values  
 318 are expressed as the mean  $\pm$  s.d. ( $n = 3$  biologically independent animals). \* $P < 0.05$ .  
 319 NS, not significant.

320

321

322

323

324

325

326

327

328

329

330

331

332

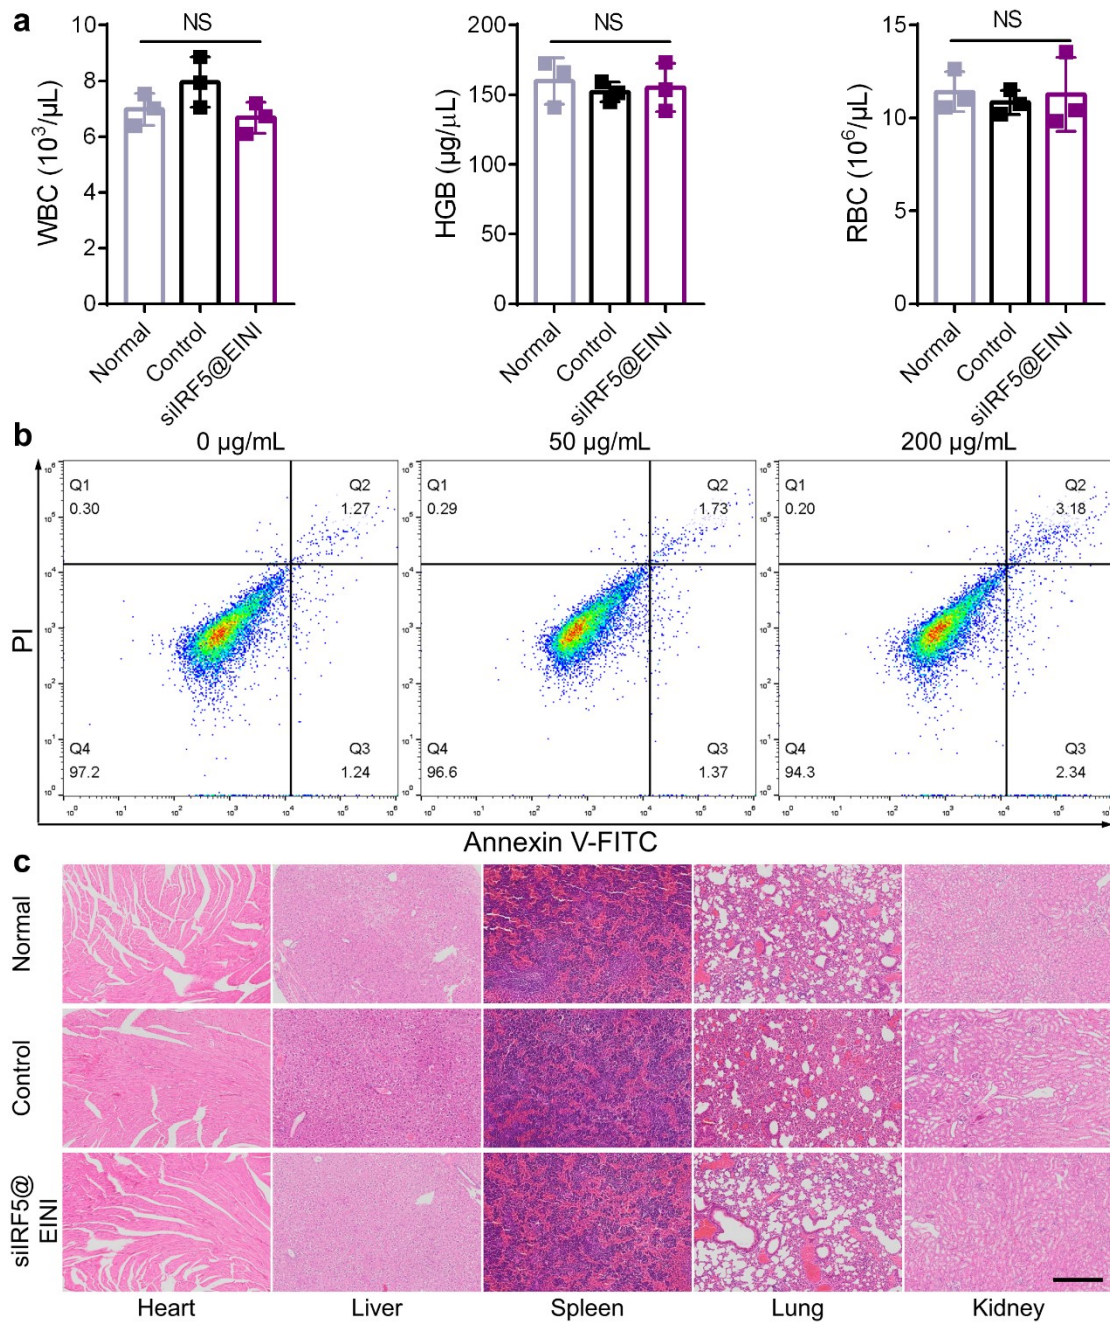

333

334 **Supplementary Figure 11. Systemic toxicity evaluation of siIRF5@EINI.** a, During

335 the experimental cycle, mice were followed up to sacrifice on day 60, the change of

336 white blood cell (WBC), hemoglobin (HGB) and red blood cell (RBC) were measured.

337 Data are presented as the mean  $\pm$  s.d. ( $n = 3$  independent experiments). NS, not

338 significant. b, Apoptosis of T cells extracted from the spleens of mice that received i.v.

339 injections of siIRF5@EINI during the experimental cycle. Mice injected with PBS

340 were used as a negative control. c, Histological sections of major organs at 60th day.

341 Scale bar, 50  $\mu\text{m}$ . ( $n = 3$  biologically independent animals).

342

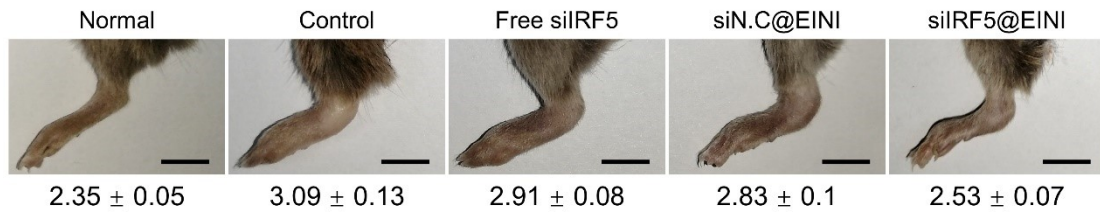

343 **Supplementary Figure 12. Representative lesions image from macroscopic**  
344 **observation of the hind paws in different treatment groups. Scale bar, 3 mm. (*n* =**  
345 **5 biologically independent animals).**

346

347

348

349

350

351

352

353

354

355

356

357

358

359

360

361

362

363

364

365

366

367

368

369

370

371

372

373

374

375

376

377

378

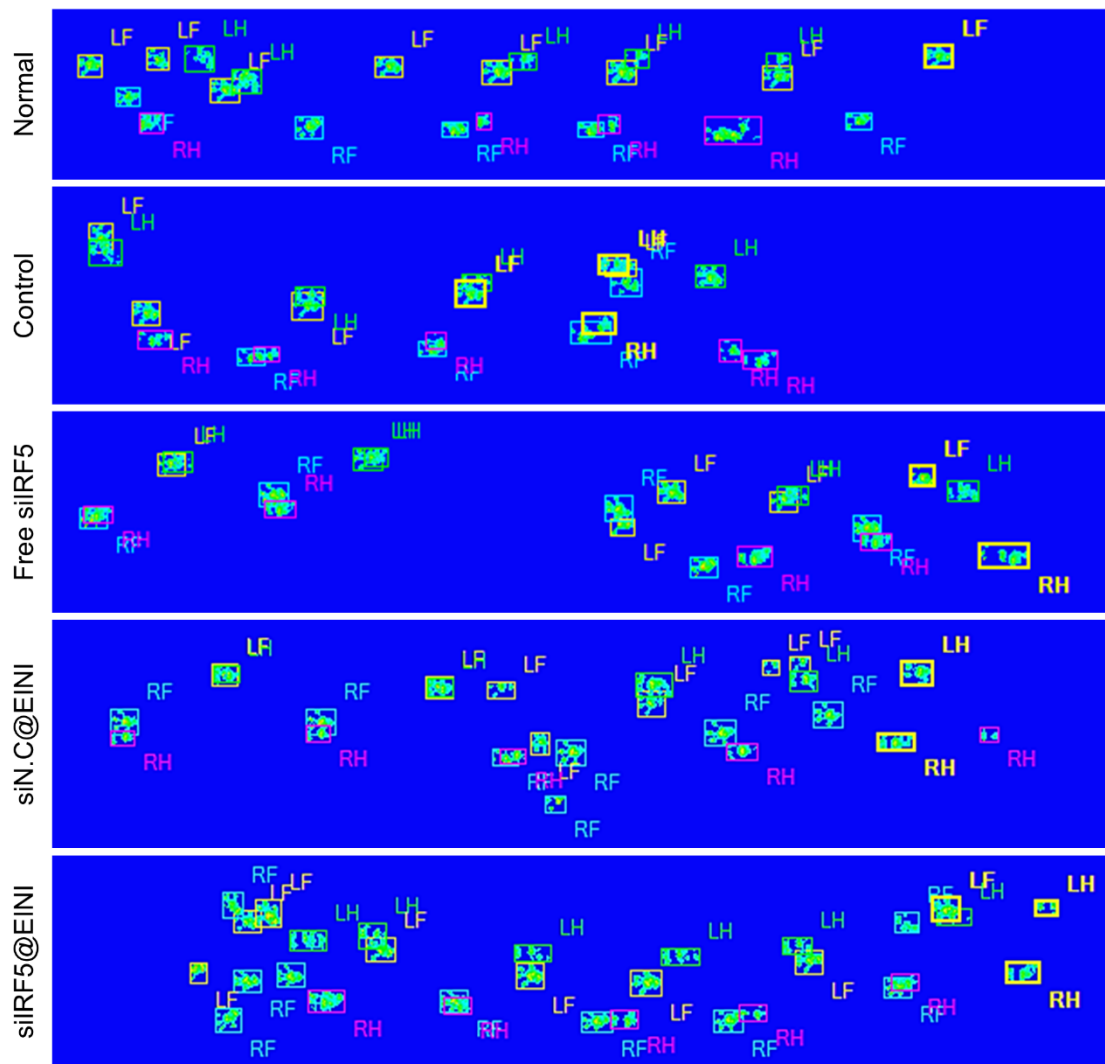

380  
381  
382  
383  
384  
385  
386  
387  
388  
389  
390  
391  
392  
393  
394  
395  
396  
397

**Supplementary Figure 13. Representative signal images of the footprint assay.**

398

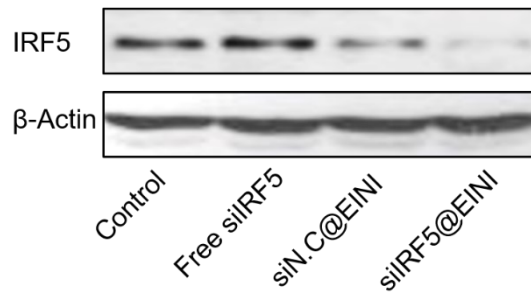

399 **Supplementary Figure 14. Western blot images of IRF5 protein levels in the**  
400 **synovial macrophages in different formulations treated group.**

401  
402  
403  
404  
405  
406  
407  
408  
409  
410  
411  
412  
413  
414  
415  
416  
417  
418  
419  
420  
421  
422  
423  
424  
425  
426  
427  
428  
429  
430  
431  
432

433

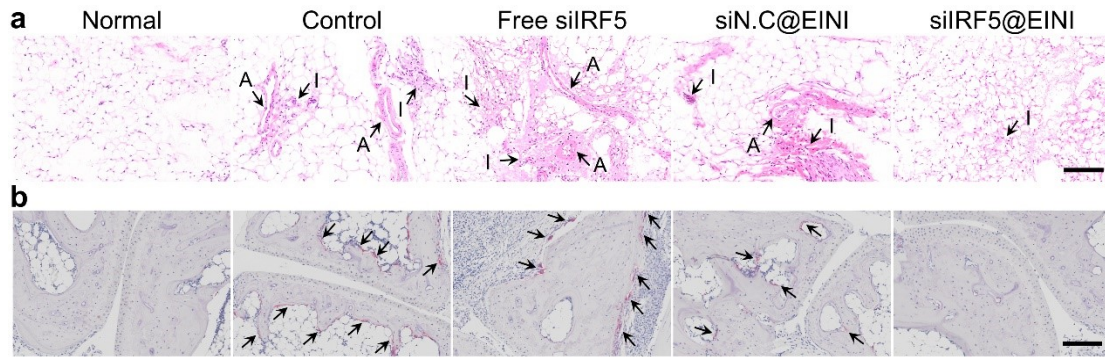

434 **Supplementary Figure 15. H&E staining of synovium and immunohistochemical**  
435 **analyses of the TRAP-stained osteoclasts. a**, H&E staining of synovium extracted  
436 from mice of different treatment groups. I, immune cell infiltration; A, angiogenesis.  
437 Scale bars = 50  $\mu$ m. ( $n = 5$  biologically independent animals). **b**, Immunohistochemical  
438 analyses of the TRAP-stained osteoclasts in the joint tissues from rats receiving the  
439 indicated treatment. Scale bar = 100  $\mu$ m. ( $n = 5$  biologically independent animals).

440

441

442

443

444

445

446

447

448

449

450

451

452

453

454

455

456

457

458

459

460

461

462

463

464

465

466

Supplementary Table 1. List of primers used for real-time PCR

|                |         |                              |
|----------------|---------|------------------------------|
| IRF5           | Forward | 5'-CATTCAGCGGGAAGTCAAGA-3'   |
|                | Reverse | 5'-TGTCTGCCGACCAAGAAAGC-3'   |
| CXCL1          | Forward | 5'-CACCCAAACCGAAGTCATAGC-3'  |
|                | Reverse | 5'-GGGGACACCTTTTAGCATCTTT-3' |
| iNOS           | Forward | 5'-AGCCAAGCCCTCACCTACTT-3'   |
|                | Reverse | 5'-CTCTGCCTATCCGTCTCGTC-3'   |
| TNF- $\alpha$  | Forward | 5'-TGGAAGTGGCAGAAGAGGCAC-3'  |
|                | Reverse | 5'-AGGGTCTGGGCCATAGAAGTGA-3' |
| Arg1           | Forward | 5'-TGCTTAGCTCTGTCTGCTTTGC-3' |
|                | Reverse | 5'-GAACACGGCAGTGGCTTTAAC-3'  |
| CD206          | Forward | 5'-GGAGGCTGATTACGAGCAGT-3'   |
|                | Reverse | 5'-CATAGGAAACGGGAGAACCA-3'   |
| $\beta$ -actin | Forward | 5'-CTACAATGAGCTGCGTGTGG-3'   |
|                | Reverse | 5'-CAGGTCCAGACGCAGGATGGC-3'  |

467
